# Supplementary material for: Syphilis and Co-Infections with HIV-1, HBV, and HCV among People Who Use Crack-Cocaine in Northern Brazil
Source: MDPI journal article supplement (doi:10.3390/pathogens11091055), 2022-09-16
Supplement: s1 [file s1]

## SUPPLEMENTARY MATERIAL

Full Title: Syphilis and co-infections with HIV-1, HBV and HCV among people who use crack-cocaine in northern Brazil.

Authors: Karen Lorena N. Baia, Ana Caroline C. Cordeiro, Paula Cristina R. Frade, Allana Gabrielly N. Gouveia, Rafael Lima Resque, Luiz Marcelo L. Pinheiro, Ricardo Roberto S. Fonseca, Luiz Fernando A. Machado, Luisa C. Martins, Emil Kupek, Benedikt Fischer, and Aldemir B. Oliveira-Filho.

**Table S1.** Sample size of people who use crack-cocaine (PWUCC) assessed in each municipality in the states of Amapá and Pará, northern Brazil.

| Municipality     | Number in figure 1 | Brazilian state | Number of PWUCC accessed |
|------------------|--------------------|-----------------|--------------------------|
| Soure            | 1                  | Pará            | 14                       |
| Salvaterra       | 2                  | Pará            | 11                       |
| Ponta de Pedras  | 3                  | Pará            | 9                        |
| Curralinho       | 4                  | Pará            | 38                       |
| Breves           | 5                  | Pará            | 86                       |
| Melgaço          | 6                  | Pará            | 12                       |
| Belém            | 7                  | Pará            | 58                       |
| Benevides        | 8                  | Pará            | 11                       |
| Bragança         | 9                  | Pará            | 165                      |
| Castanhal        | 10                 | Pará            | 90                       |
| Marituba         | 11                 | Pará            | 40                       |
| Abaetetuba       | 12                 | Pará            | 19                       |
| Cametá           | 13                 | Pará            | 13                       |
| Capanema         | 14                 | Pará            | 113                      |
| Marabá           | 15                 | Pará            | 25                       |
| Parauapebas      | 16                 | Pará            | 18                       |
| Altamira         | 17                 | Pará            | 13                       |
| Santarém         | 18                 | Pará            | 29                       |
| Tucuruí          | 19                 | Pará            | 17                       |
| Augusto Correa   | 20                 | Pará            | 12                       |
| Laranjal do Jari | 21                 | Amapá           | 22                       |
| Macapá           | 22                 | Amapá           | 61                       |
| Mazagão          | 23                 | Amapá           | 26                       |
| Santana          | 24                 | Amapá           | 59                       |
| Vitória do Jari  | 25                 | Amapá           | 15                       |
| Porto Grande     | 26                 | Amapá           | 14                       |

**Table S2.** Venereal Disease Research Laboratory (VDRL) results and titers among people who use crack-cocaine in northern Brazil.

| VDRL             | N (%)      |
|------------------|------------|
| Plasma (n = 287) |            |
| Positive         | 238 (82.9) |
| Negative         | 49 (17.1)  |
| Titers (n = 238) |            |
| 1:16             | 43 (18.1)  |
| 1:32             | 88 (36.9)  |
| 1:64             | 54 (22.7)  |
| 1:128            | 28 (11.8)  |
| 1:256            | 18 (7.6)   |
| 1:512            | 7 (2.9)    |

**Table S3.** Factors not associated with syphilis among people who use crack-cocaine in northern Brazil using logistic regression models.

| Factors                                                                   | Total | Syphilis +<br>(%) | Bivariate<br>OR (95% CI) | Multivariate<br>OR (95% CI) |
|---------------------------------------------------------------------------|-------|-------------------|--------------------------|-----------------------------|
| Male <i>versus</i> (vs.) Female                                           | 720   | 199 (27.6)        | 0.8 (0.6 – 1.1)          | 1.2 (0.7 – 1.5)             |
| Non-white vs. White                                                       | 871   | 250 (28.7)        | 1.1 (0.7 – 1.7)          | 1.5 (0.6 – 2.3)             |
| Not married vs. Married <sup>†</sup>                                      | 933   | 271 (29.0)        | 1.1 (0.5 – 1.9)          | 1.4 (0.6 – 2.2)             |
| Unstable housing (including homelessness) vs. Stable housing <sup>†</sup> | 157   | 52 (33.1)         | 1.3 (0.9 – 1.8)          | 1.5 (0.8 – 2.8)             |
| Sharing of crack-cocaine use equipment vs. No equipment sharing           | 327   | 106 (32.4)        | 1.3 (0.9 – 1.7)          | 1.6 (0.8 – 2.6)             |
| Heterosexual vs. Same sex                                                 | 901   | 264 (29.3)        | 1.2 (0.7 – 2.0)          | 1.5 (0.6 – 2.4)             |
| Oral sex vs. No oral sex <sup>†</sup>                                     | 602   | 181 (30.1)        | 1.1 (0.9 – 1.6)          | 1.4 (0.8 – 2.0)             |
| Anal sex vs. No anal sex <sup>†</sup>                                     | 311   | 98 (31.5)         | 1.2 (0.8 – 1.6)          | 1.5 (0.8 – 2.1)             |
| No access to public health service <sup>†</sup>                           | 902   | 269 (29.8)        | 1.7 (0.9 – 2.8)          | 2.4 (0.8 – 3.4)             |

<sup>†</sup>Last 12 months. OR: Odds Ratio. 95% CI: 95% confidence interval.

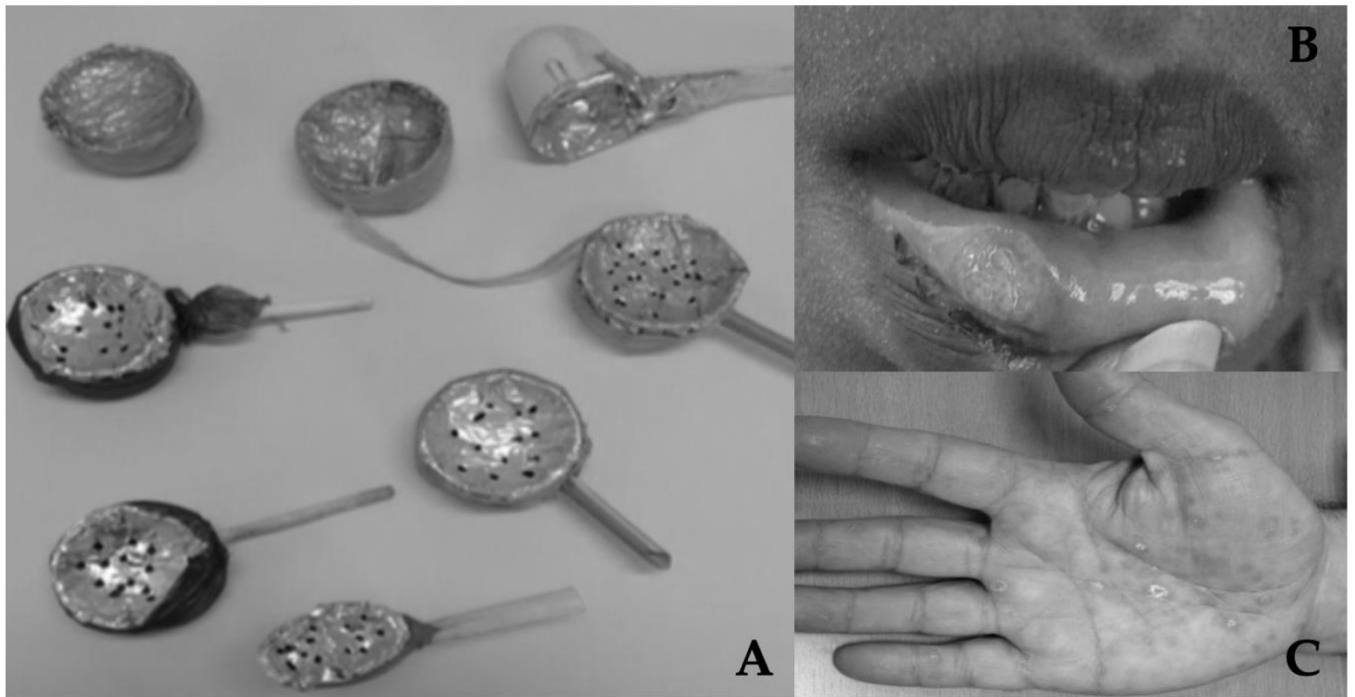

**Figure S1.** Characteristics detected among people who use crack-cocaine in northern Brazil. Reservoir manually made for crack-cocaine use (A). Lip lesion (B). Skin lesion (C).
